# Supplementary material for: One pot synthesis of tetrasubstituted thiophenes: [3 + 2] annulation strategy
Source: Royal Society of Chemistry journal article supplement (doi:10.1039/c5ra01290b), 2015-01-01
Supplement: c5ra01290b1.pdf [file c5ra01290b1.pdf]

## Supporting information

### One pot synthesis of tetrasubstituted thiophenes: [3+2]

#### Annulation Strategy

*Satya Narayan Sahu,<sup>a</sup> Maneesh Kumar Gupta,<sup>a</sup> SurjeetSingh,<sup>a</sup> Pratik Yadav,<sup>a</sup> Rahul Panwar,<sup>a</sup>*

*Abhinav Kumar,<sup>b</sup> Vishnu Ji Ram,<sup>b</sup> Brijesh Kumar<sup>c</sup> and Ramendra Pratap<sup>a,\*</sup>*

<sup>a</sup>Department of Chemistry, University of Delhi, North Campus, Delhi, India-110007

<sup>b</sup>Department of Chemistry, University of Lucknow, Lucknow, Uttar Pradesh, India-226009.

<sup>c</sup>Division of SAIF, Central Drug Research Institute, Lucknow, Uttar Pradesh, India-226001

| Contents                                                              | Page No. |
|-----------------------------------------------------------------------|----------|
| <sup>1</sup> H and <sup>13</sup> C spectra of compound <b>10a-10o</b> | 2-16     |
| XYZ Coordinates Monomer                                               | 17-22    |

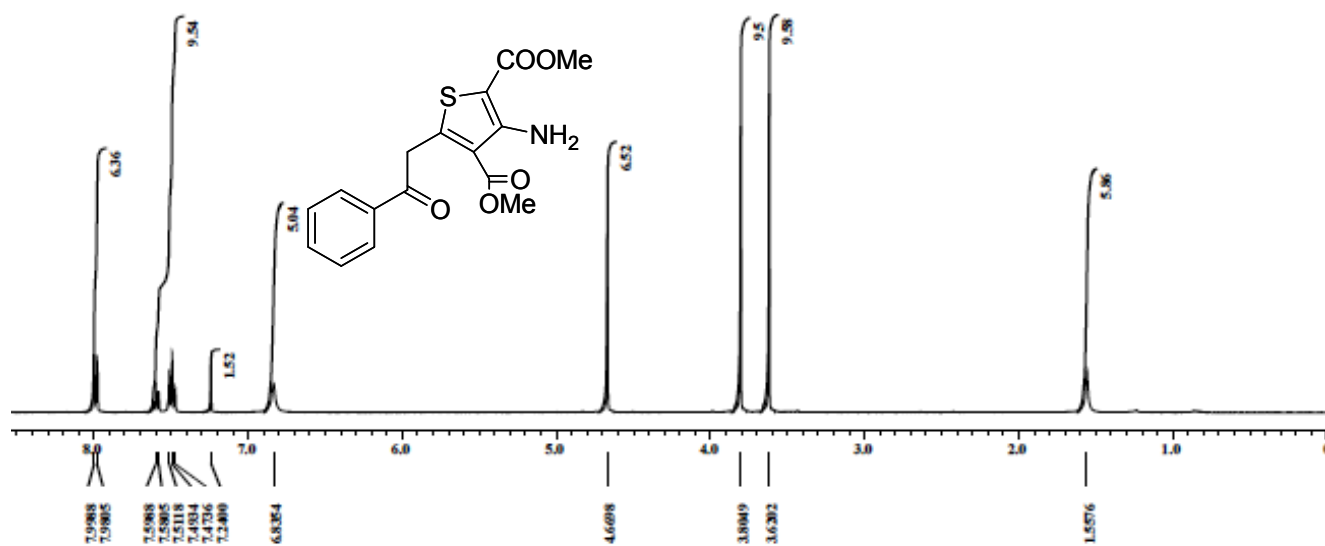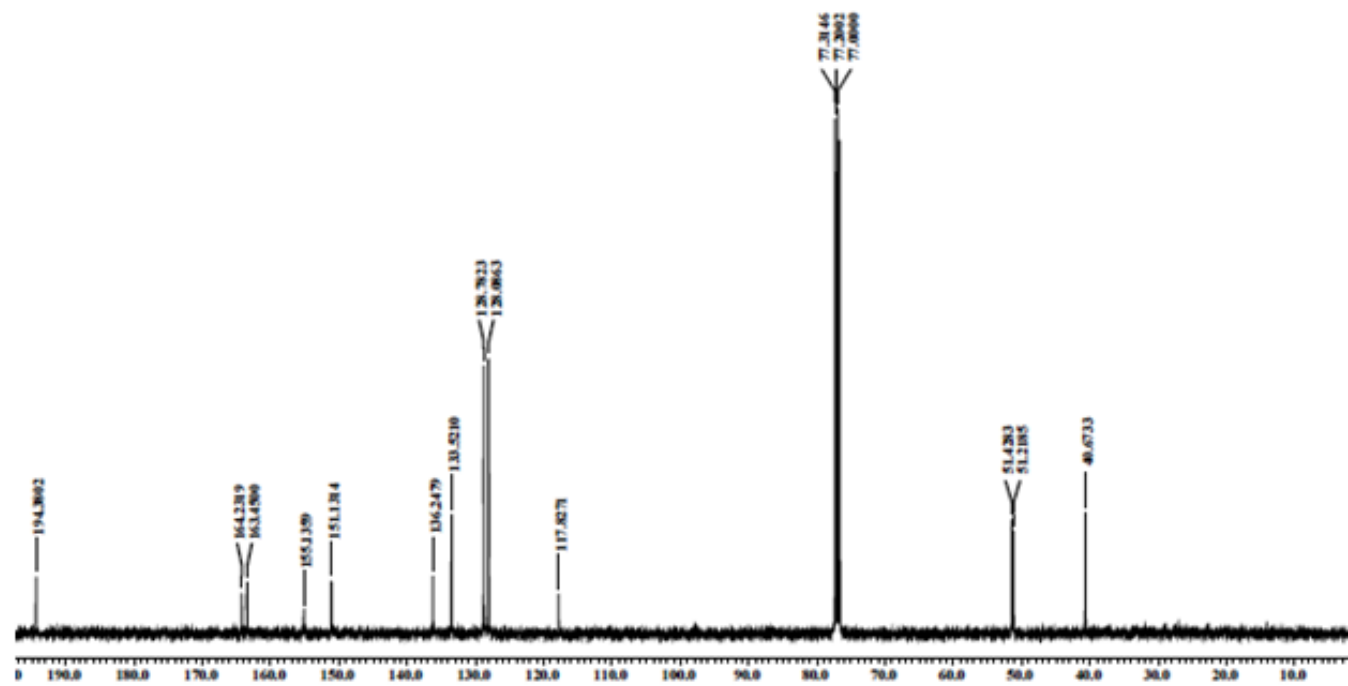

<sup>1</sup>H and <sup>13</sup>C spectra of spectra of dimethyl 3-amino-5-(2-oxo-2-phenylethyl)thiophene-2,4-dicarboxylate(10a)

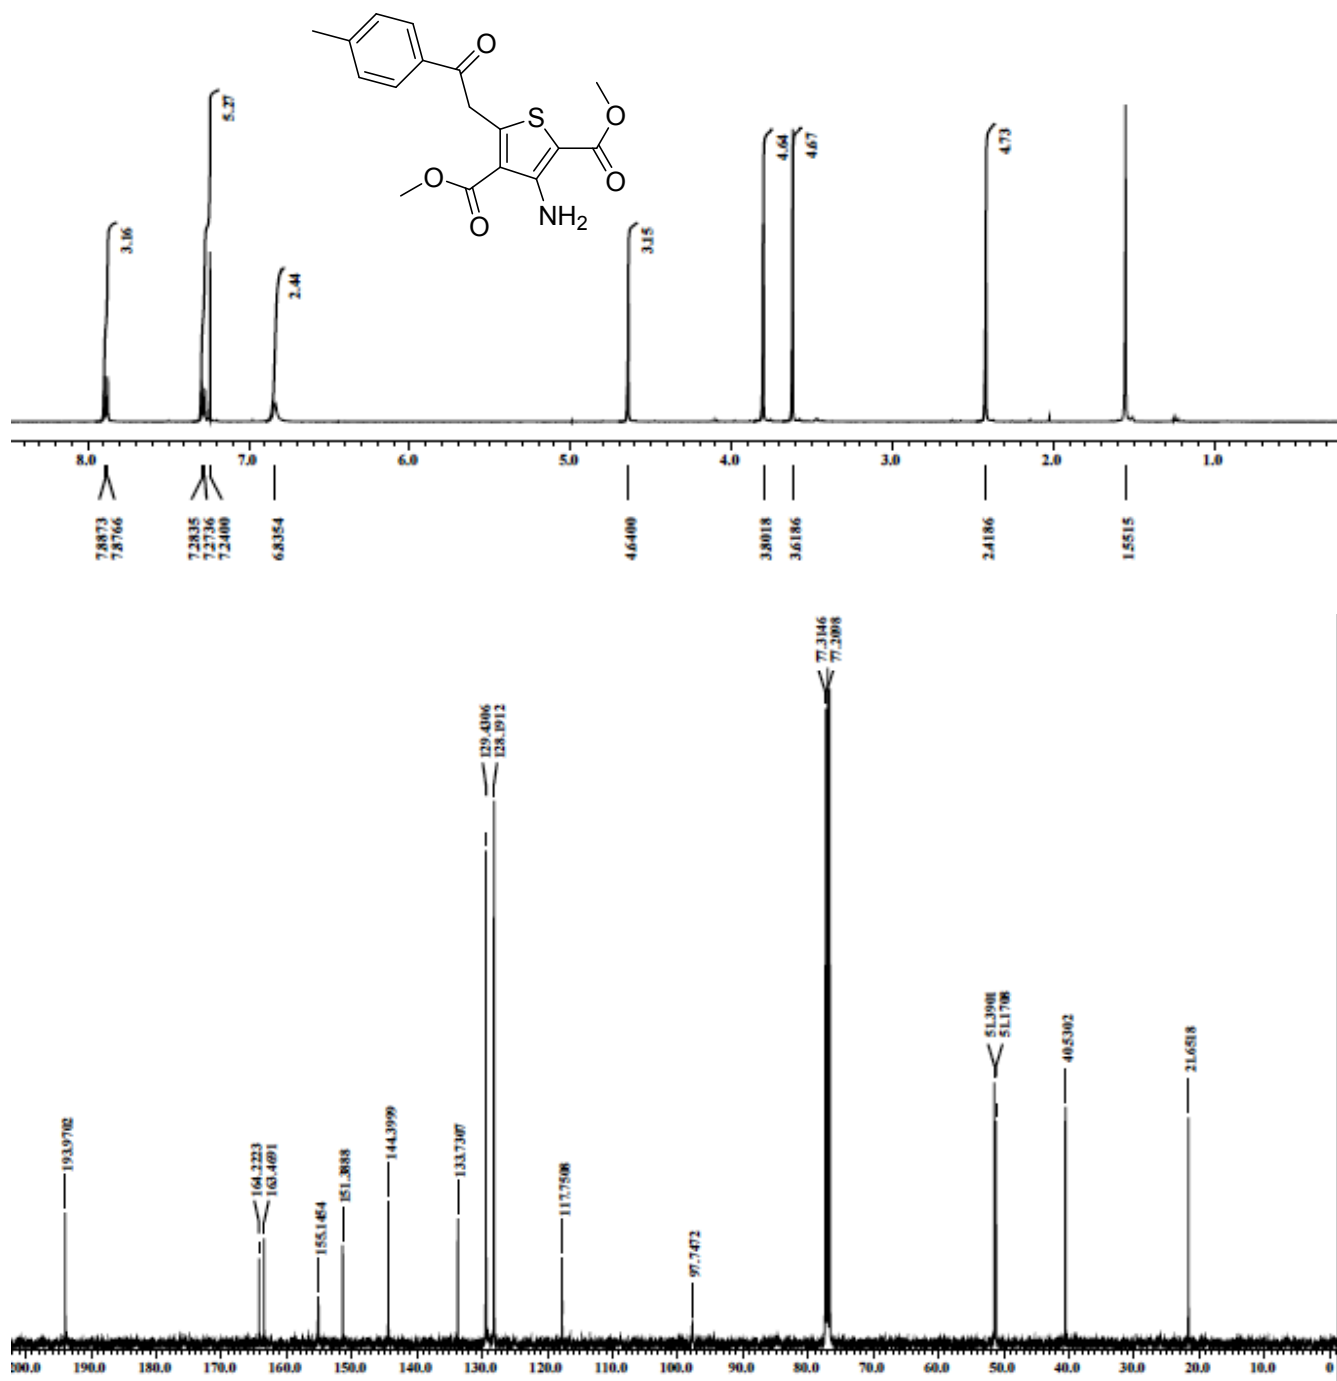

<sup>1</sup>H and <sup>13</sup>C spectra of dimethyl 3-amino-5-(2-oxo-2-(p-tolyl)ethyl)thiophene-2,4-dicarboxylate (10b)

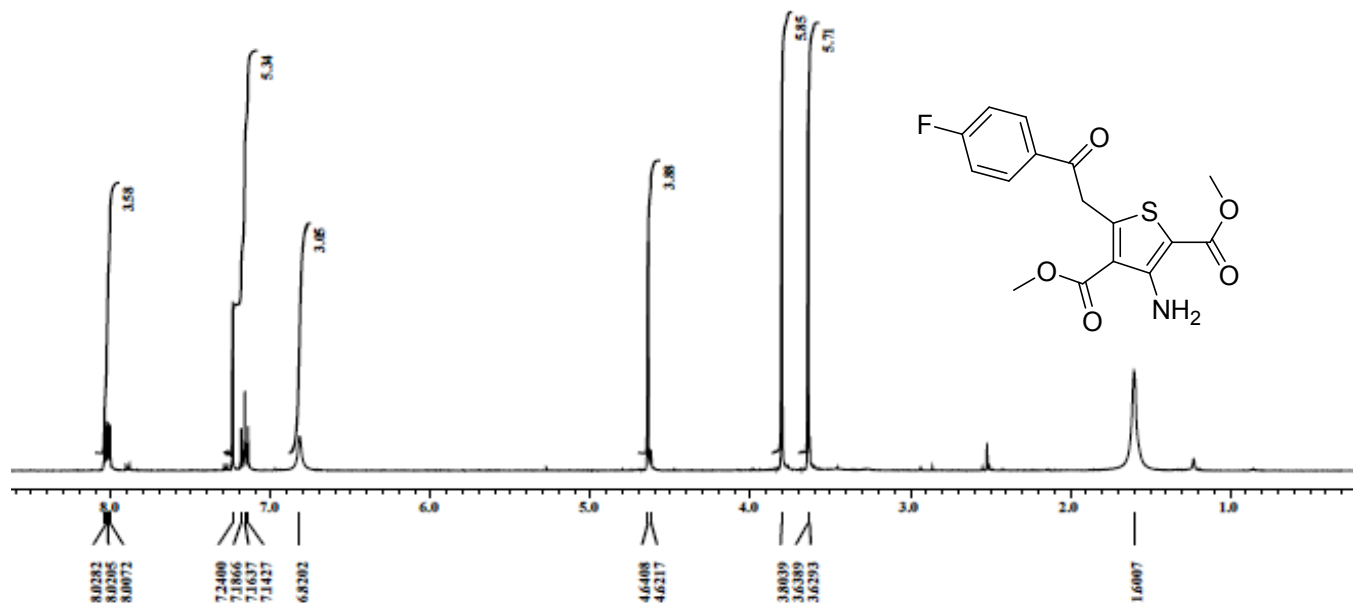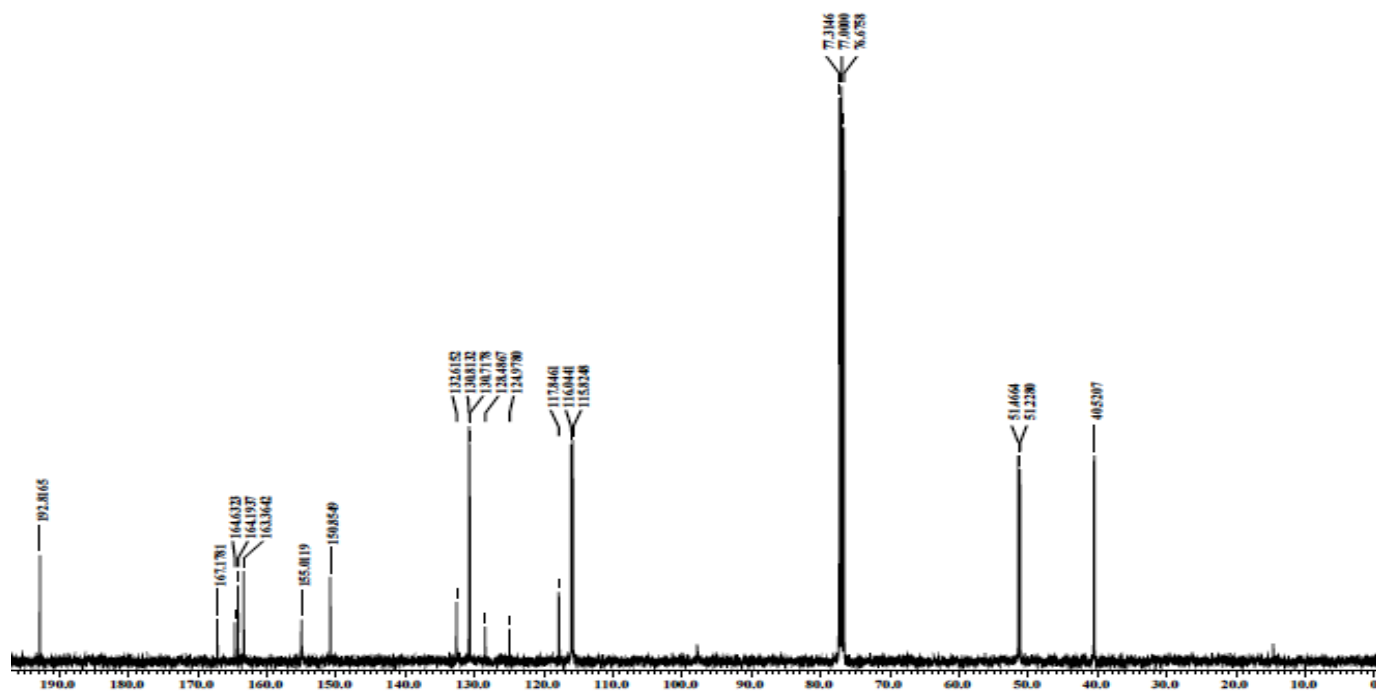

$^1\text{H}$  and  $^{13}\text{C}$  spectra of spectra of dimethyl 3-amino-5-(2-(4-fluorophenyl)-2-oxoethyl)thiophene-2,4-dicarboxylate(10c)

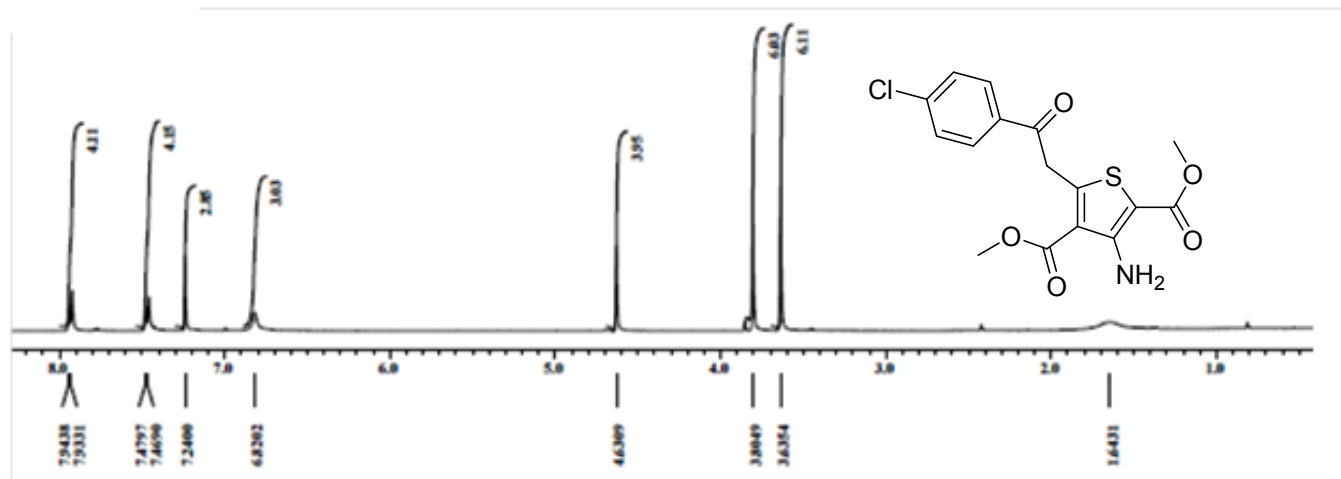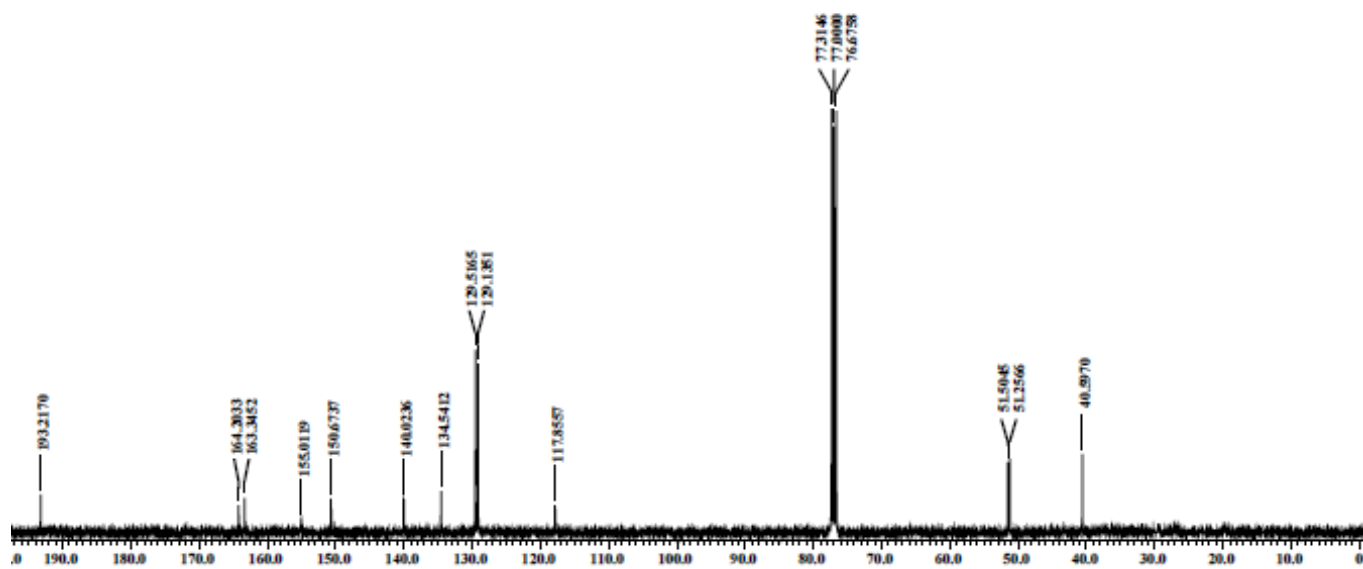

<sup>1</sup>H and <sup>13</sup>C spectra of spectra of dimethyl 3-amino-5-(2-(4-chlorophenyl)-2-oxoethyl)thiophene-2,4-dicarboxylate (**10d**)

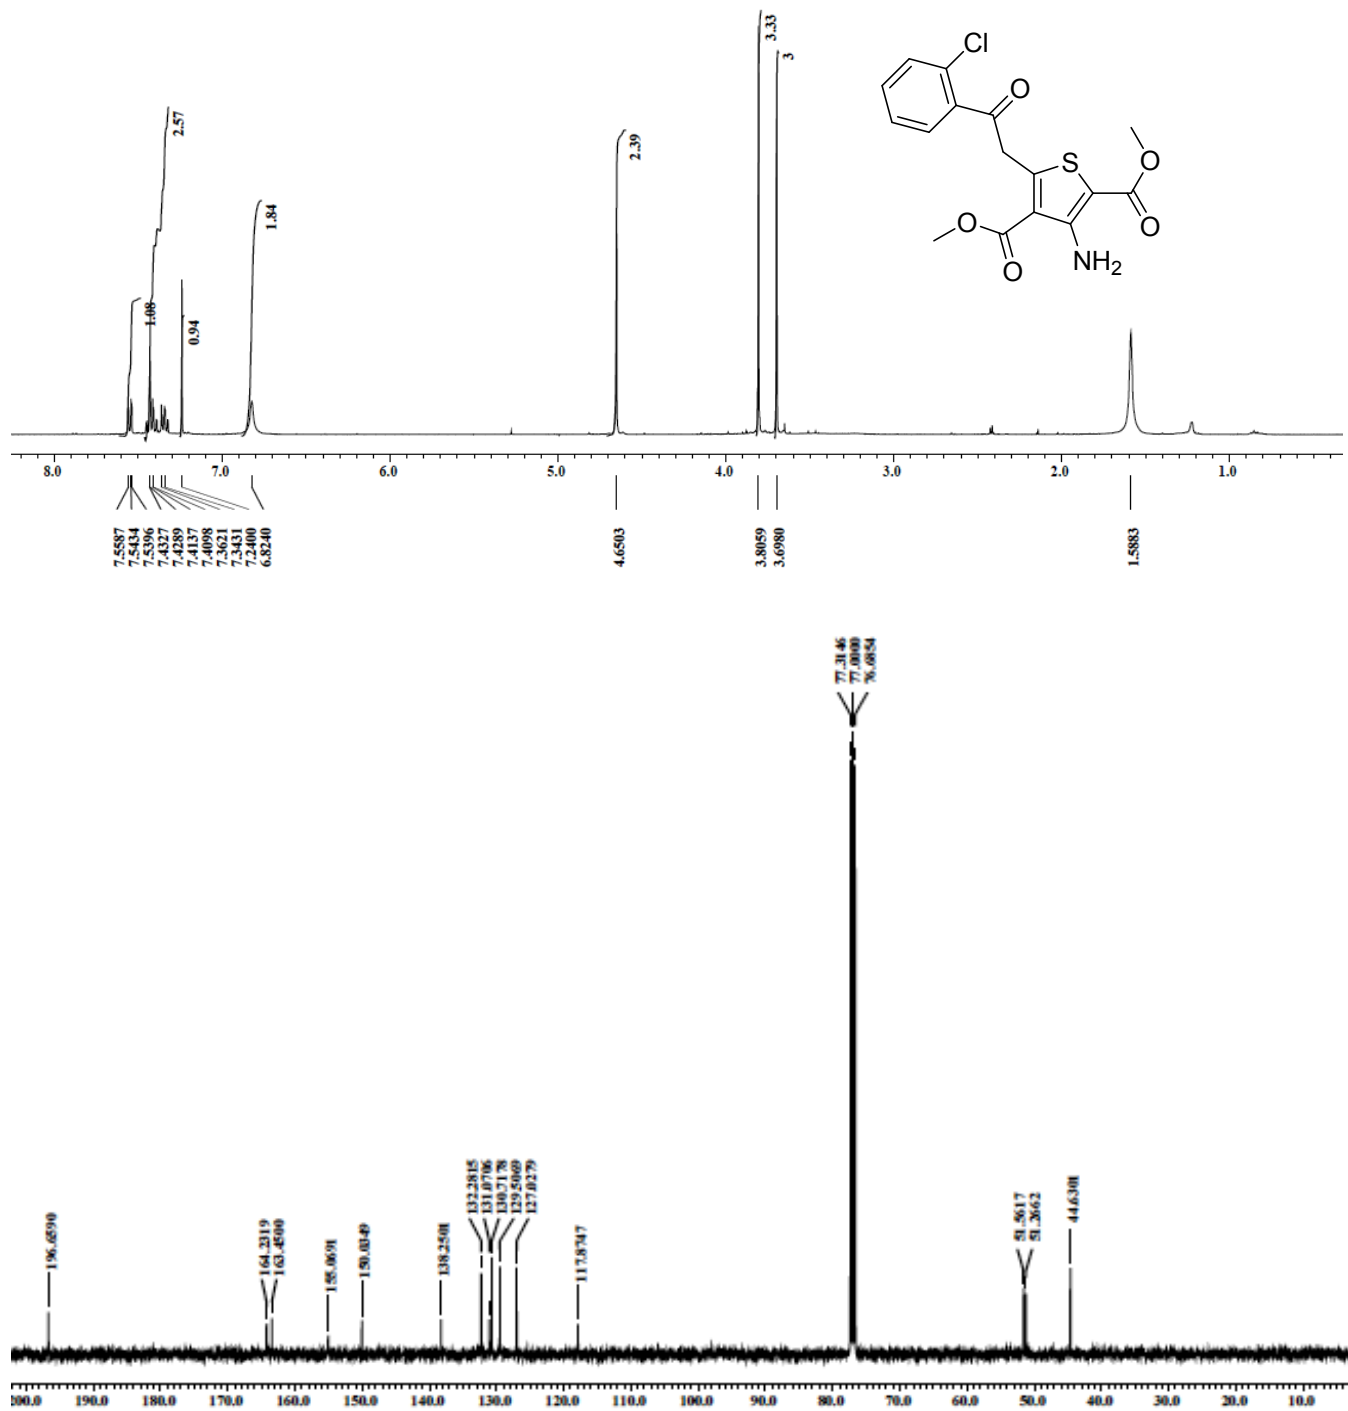

<sup>1</sup>H and <sup>13</sup>C spectra of spectra of dimethyl 3-amino-5-(2-(2-chlorophenyl)-2-oxoethyl)thiophene-2,4-dicarboxylate (**10e**)

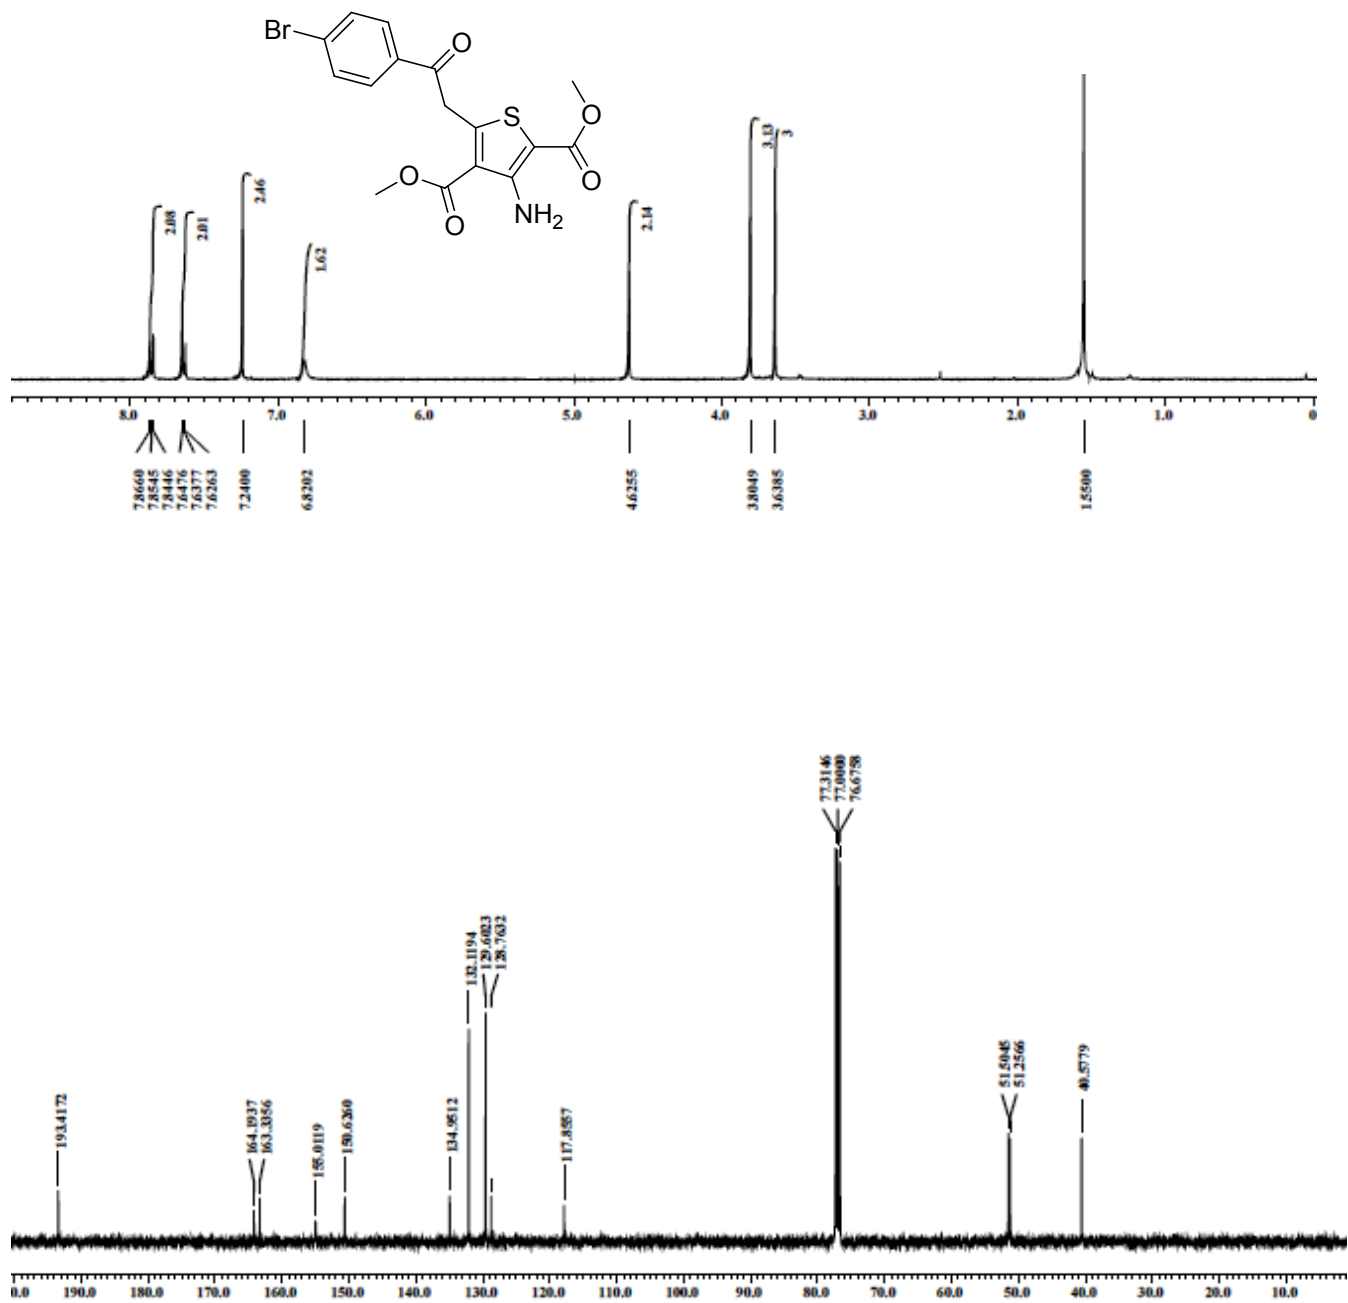

<sup>1</sup>H and <sup>13</sup>C spectra of spectra of dimethyl 3-amino-5-(2-(4-bromophenyl)-2-oxoethyl)thiophene-2,4-dicarboxylate (**10f**)

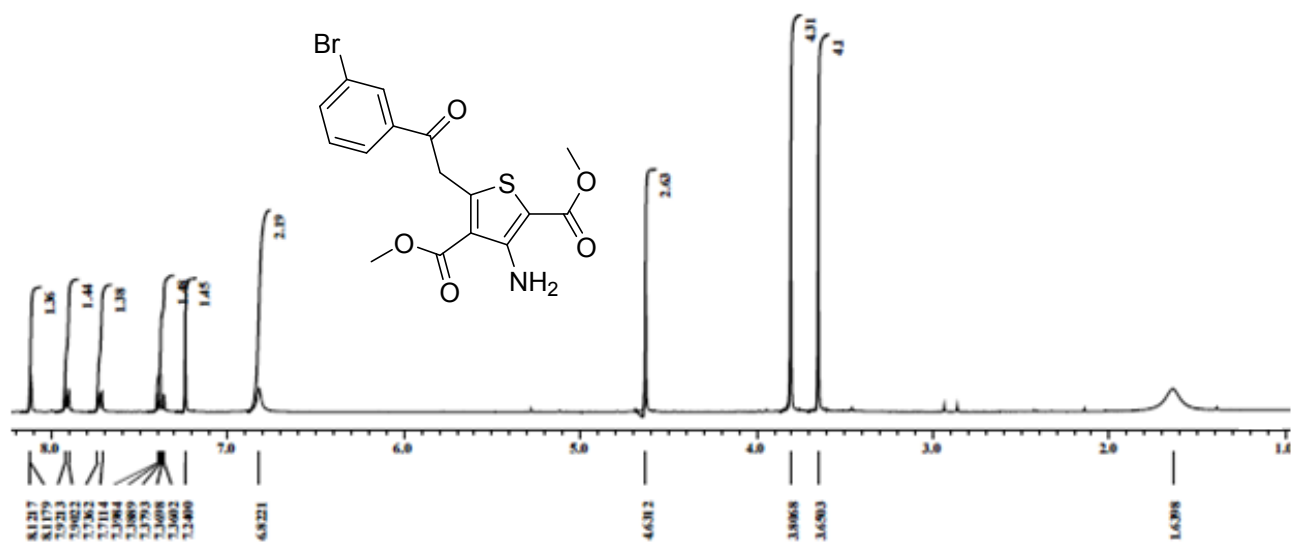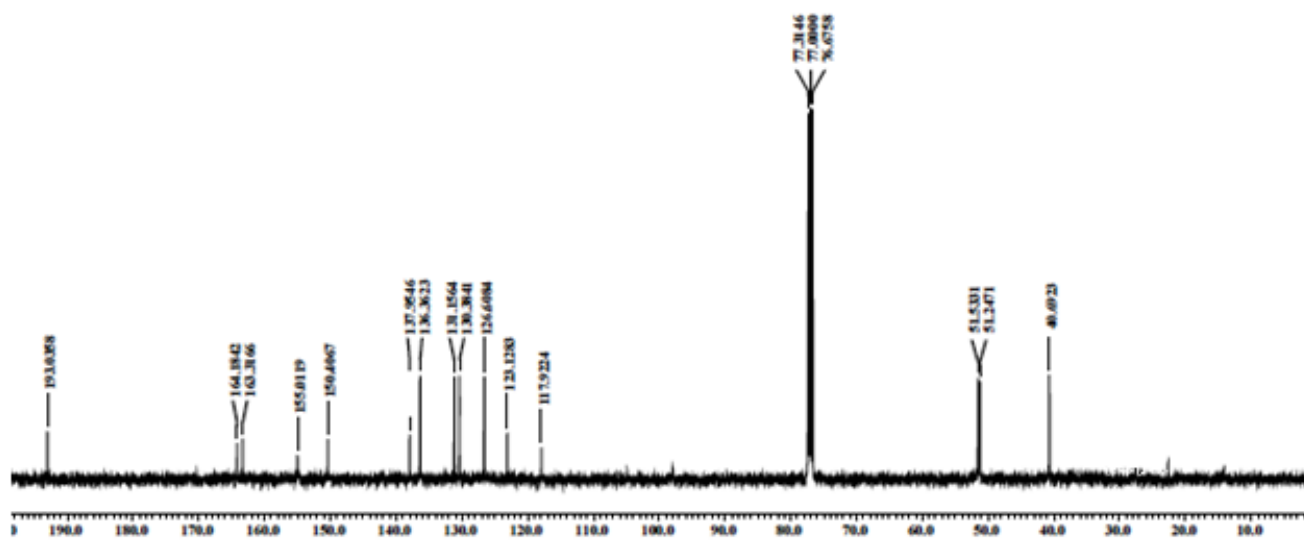

<sup>1</sup>H and <sup>13</sup>C spectra of spectra of dimethyl 3-amino-5-(2-(3-bromophenyl)-2-oxoethyl)thiophene-2,4-dicarboxylate (**10g**)



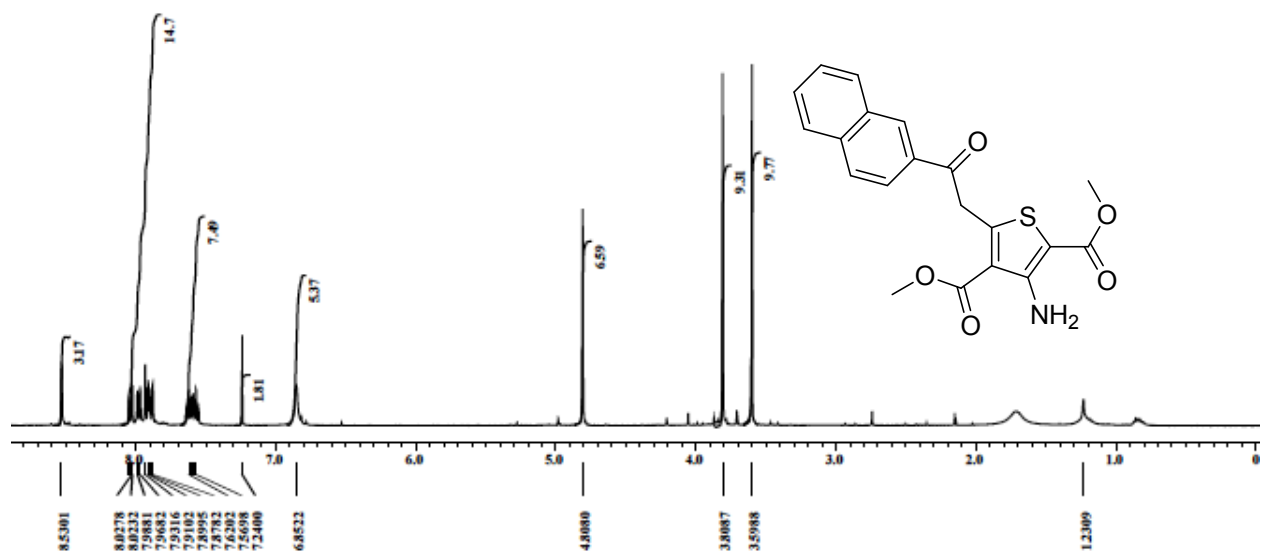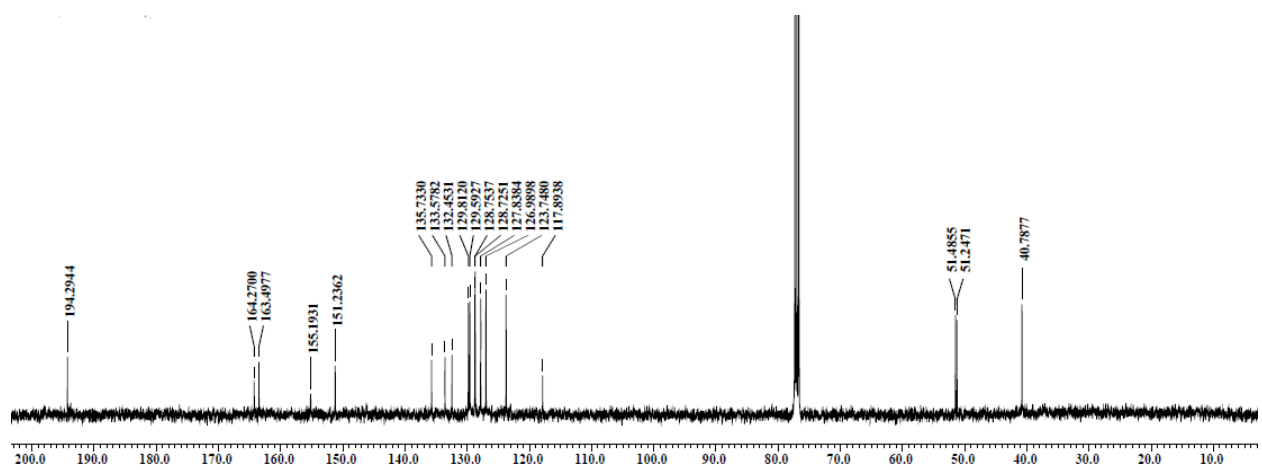

<sup>1</sup>H and <sup>13</sup>C spectra of spectra of dimethyl 3-amino-5-(2-(naphthalen-2-yl)-2-oxoethyl)thiophene-2,4-dicarboxylate (**10h**)

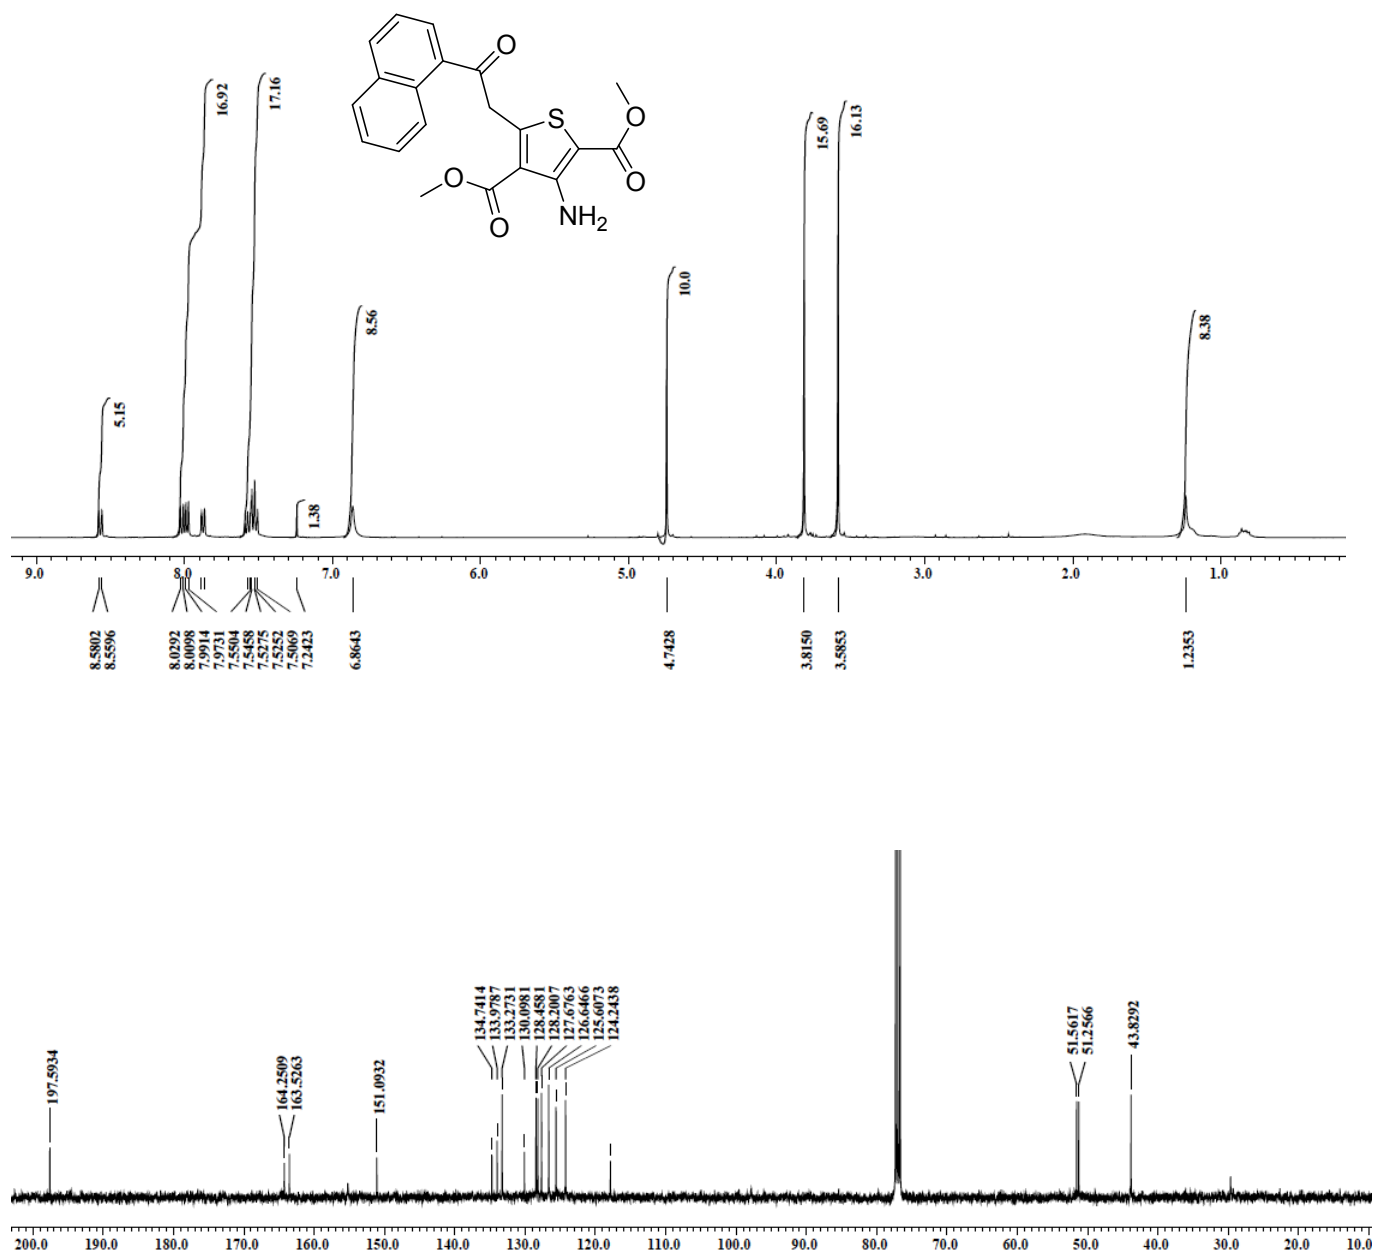

<sup>1</sup>H and <sup>13</sup>C spectra of spectra of dimethyl 3-amino-5-(2-(naphthalen-1-yl)-2-oxoethyl)thiophene-2,4-dicarboxylate (**10i**)

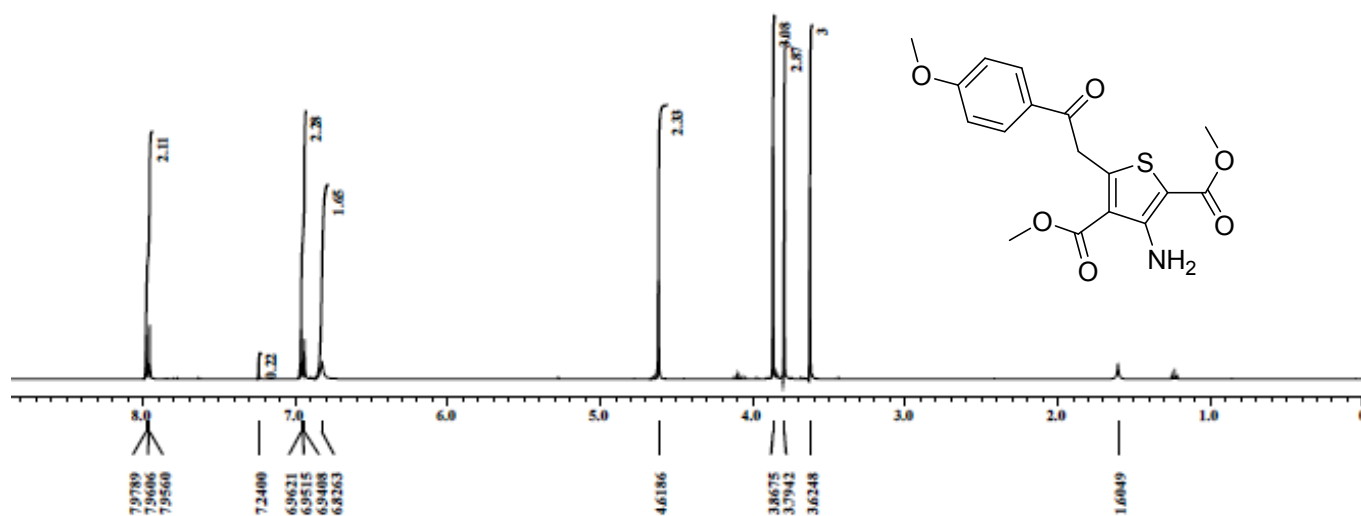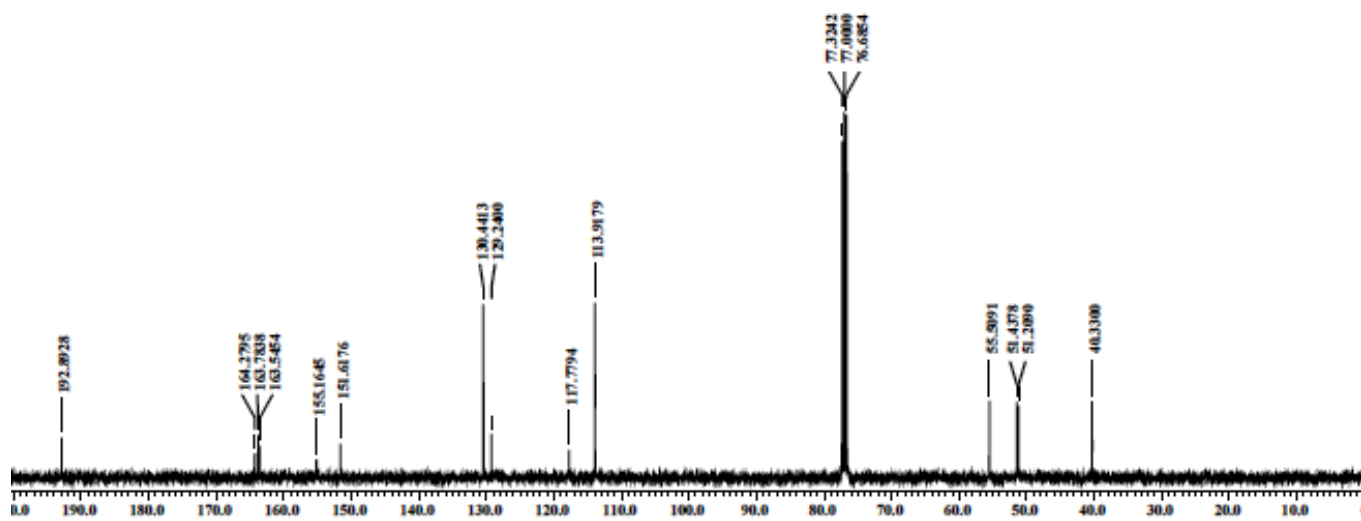

$^1\text{H}$  and  $^{13}\text{C}$  spectra of spectra of dimethyl 3-amino-5-(2-(4-methoxyphenyl)acetyl)thiophene-2,4-dicarboxylate (**10j**)

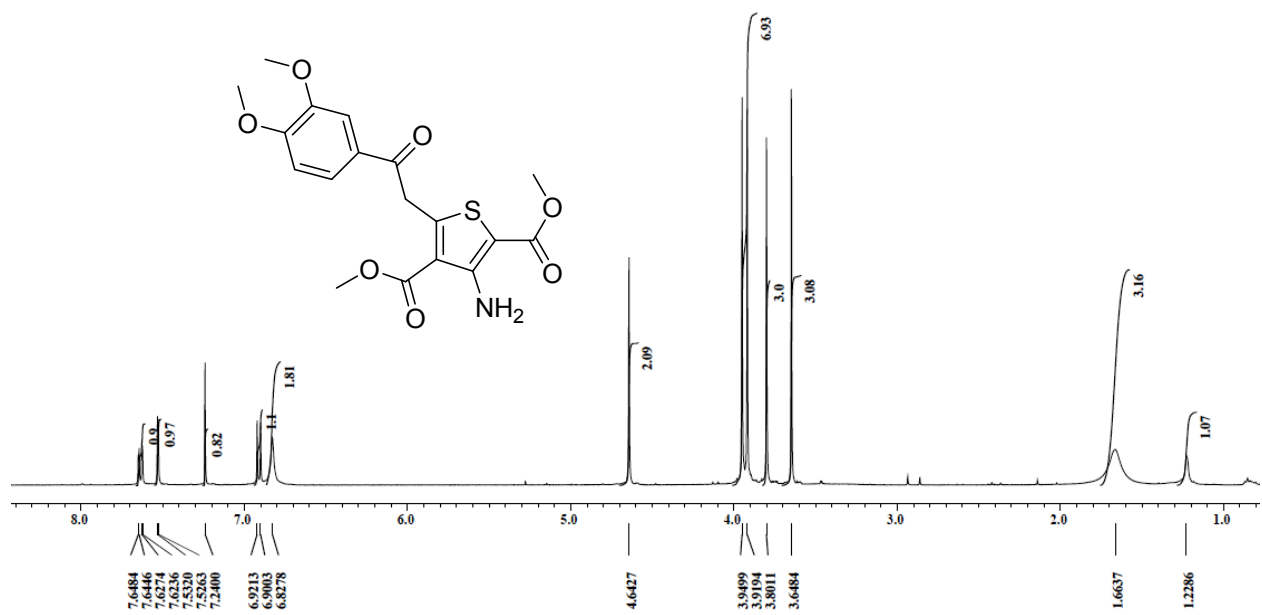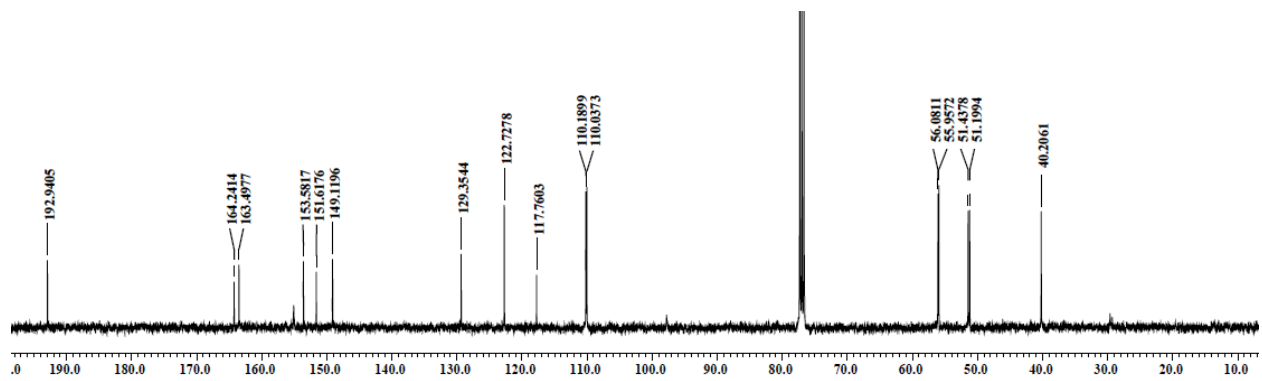

<sup>1</sup>H and <sup>13</sup>C spectra of dimethyl 3-amino-5-(2-(3,4-dimethoxyphenyl)-2-oxoethyl)thiophene-2,4-dicarboxylate (**10k**)

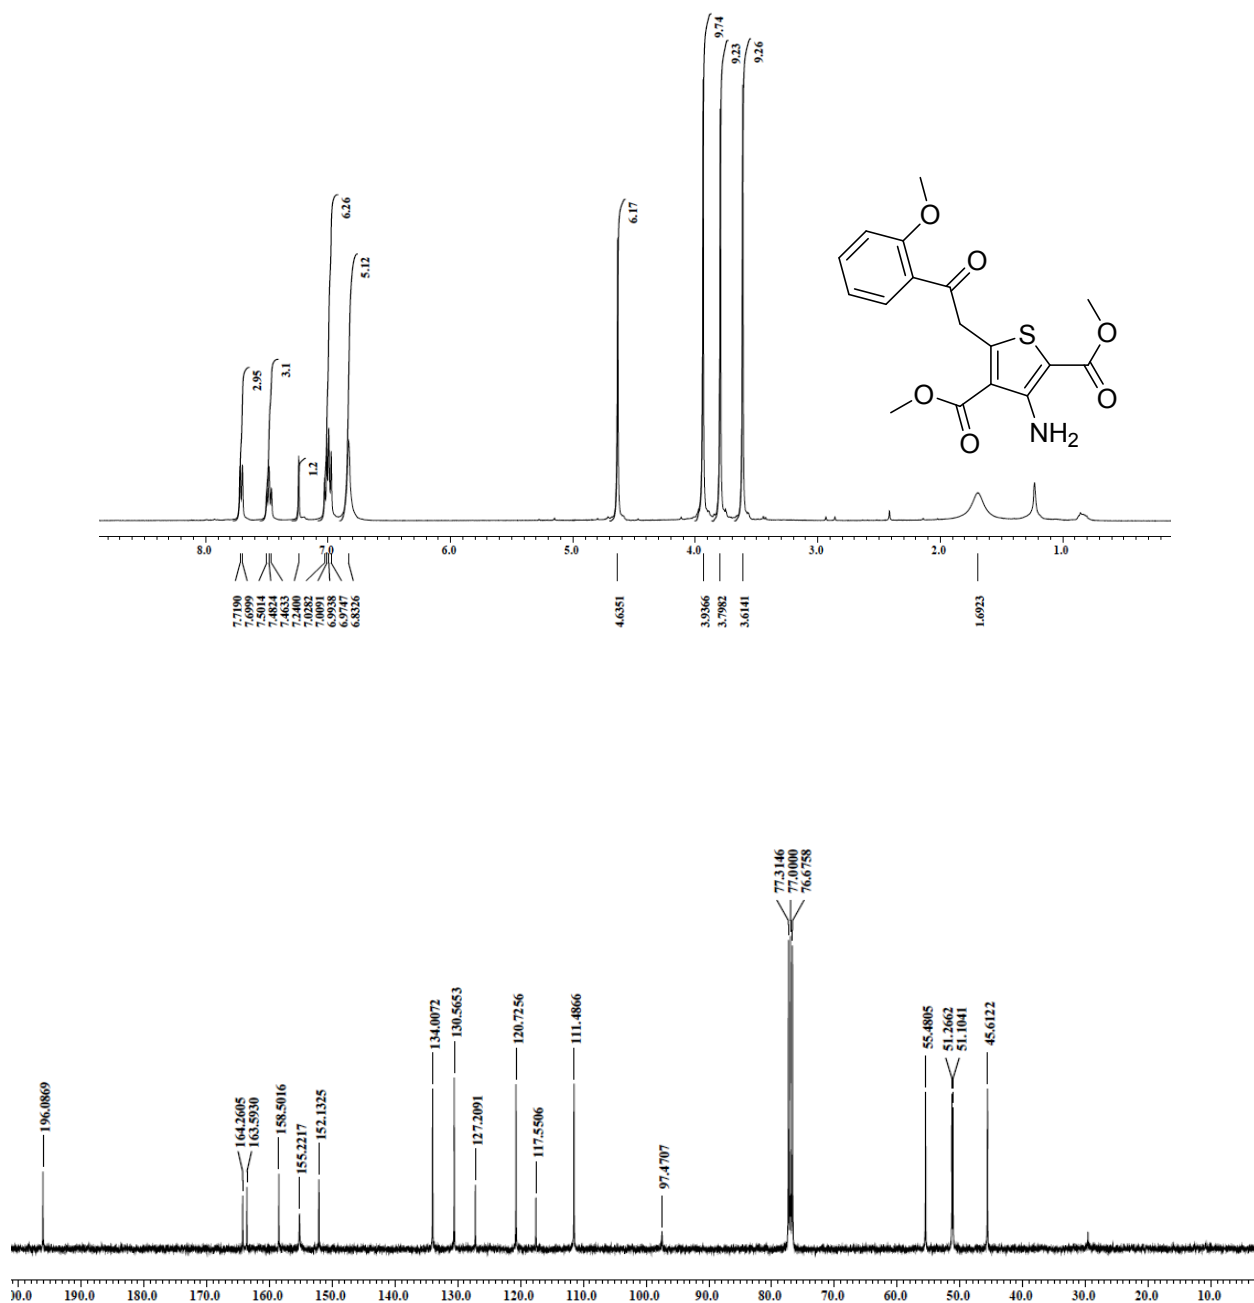

<sup>1</sup>H and <sup>13</sup>C spectra of dimethyl 3-amino-5-(2-(2-methoxyphenyl)-2-oxoethyl)thiophene-2,4-dicarboxylate (**10**)

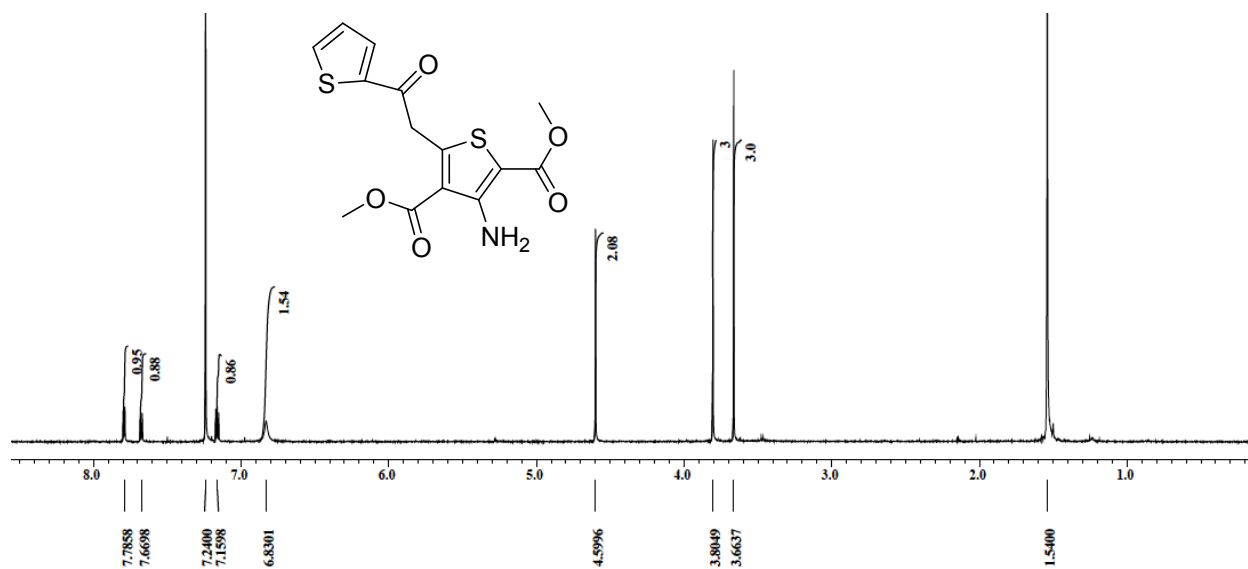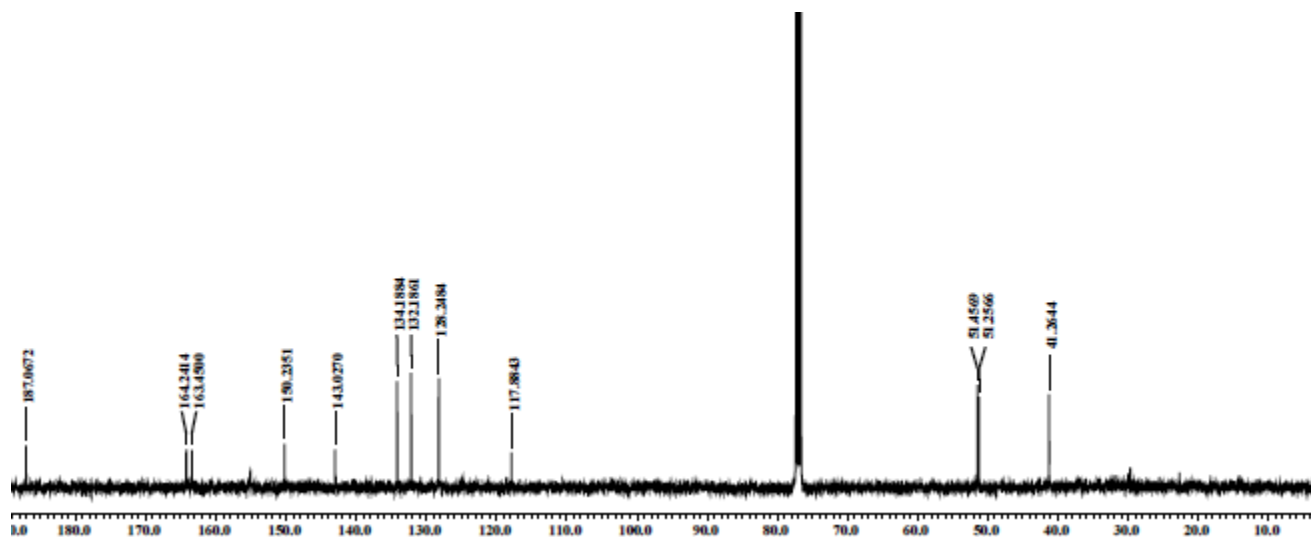

<sup>1</sup>H and <sup>13</sup>C spectra of dimethyl 3-amino-5-(2-oxo-2-(thiophen-2-yl)ethyl)thiophene-2,4-dicarboxylate (**10m**)

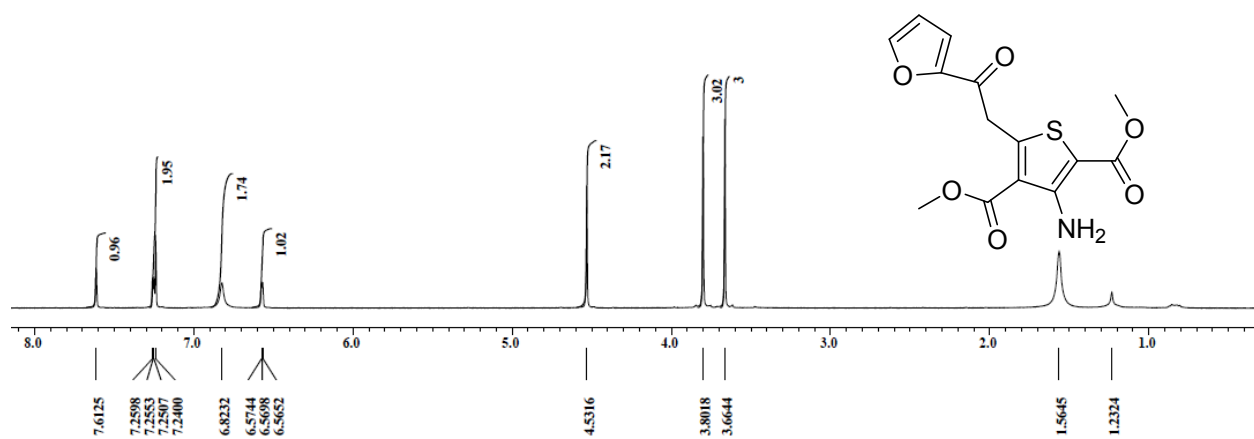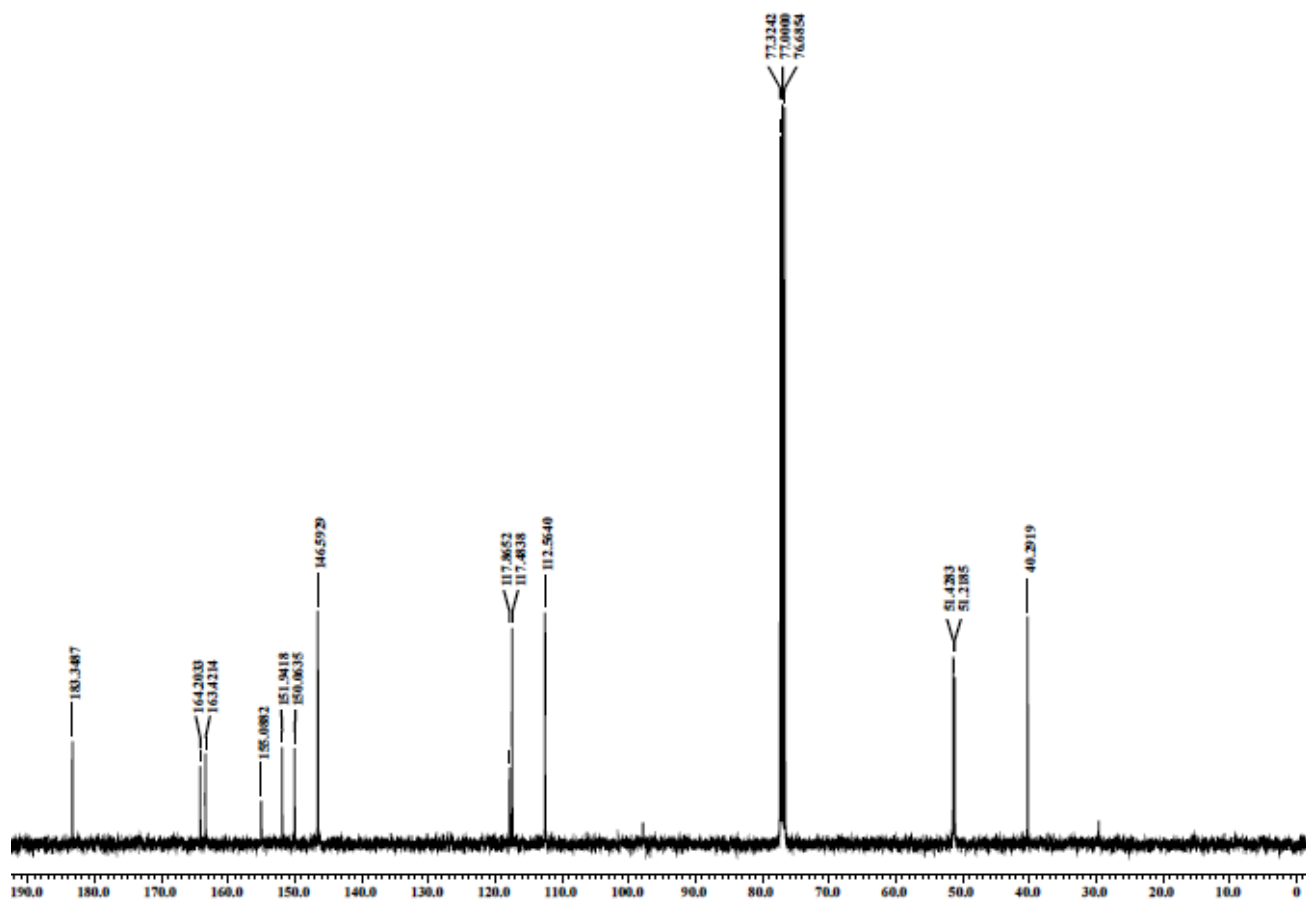

<sup>1</sup>H and <sup>13</sup>C spectra of dimethyl 3-amino-5-(2-(furan-2-yl)-2-oxoethyl)thiophene-2,4-dicarboxylate (**10n**)

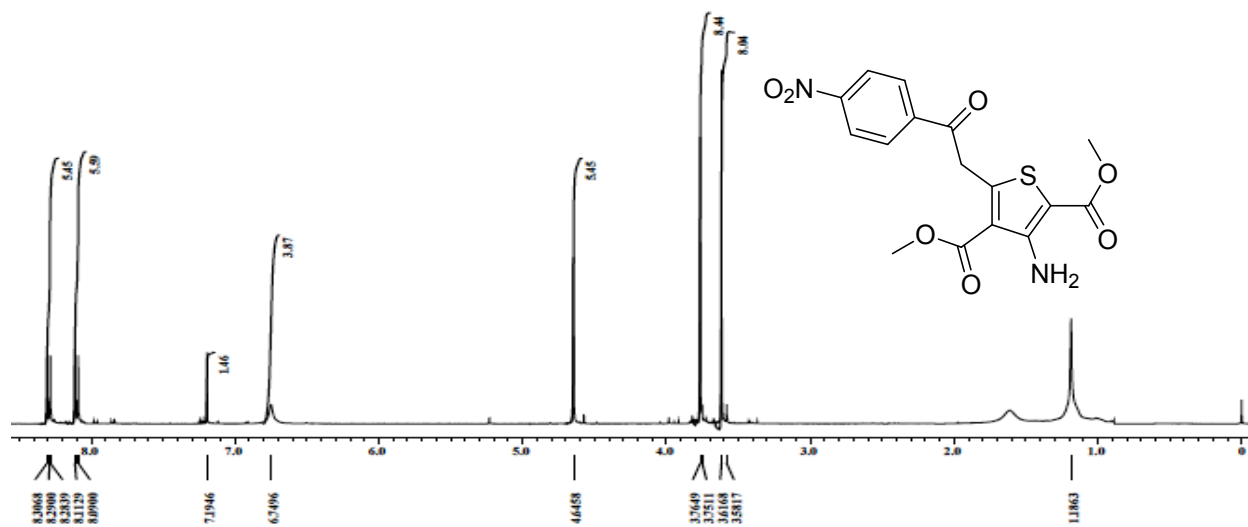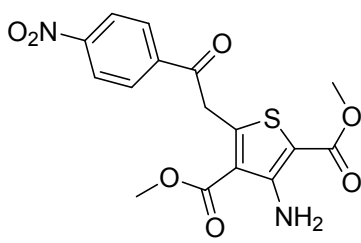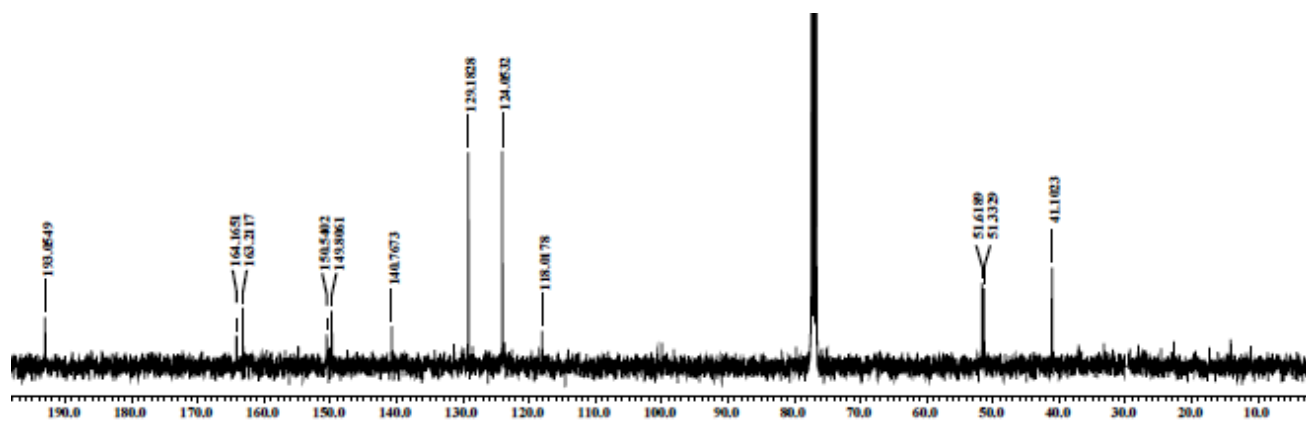

<sup>1</sup>H and <sup>13</sup>C spectra of dimethyl 3-amino-5-(2-(4-nitrophenyl)-2-oxoethyl)thiophene-2,4-dicarboxylate (**10o**)



XYZ Coordinates Monomer

E = -1447.8510683

---

| Center<br>Number | Atomic<br>Number | Atomic<br>Type | Coordinates (Angstroms) |           |           |
|------------------|------------------|----------------|-------------------------|-----------|-----------|
|                  |                  |                | X                       | Y         | Z         |
| 1                | 16               | 0              | -1.594477               | -1.438687 | -0.490186 |
| 2                | 8                | 0              | -4.461386               | -2.005860 | -0.046557 |
| 3                | 8                | 0              | 1.482311                | -0.346821 | 1.537224  |
| 4                | 8                | 0              | 1.103034                | 2.225389  | -0.460077 |
| 5                | 7                | 0              | -3.124439               | 2.070865  | 0.320389  |
| 6                | 6                | 0              | 1.931008                | -0.553002 | 0.424649  |
| 7                | 8                | 0              | -0.717310               | 3.391074  | 0.172735  |
| 8                | 8                | 0              | -5.138492               | 0.112252  | 0.417377  |
| 9                | 6                | 0              | 3.392154                | -0.817108 | 0.215625  |
| 10               | 6                | 0              | -0.402978               | -0.195063 | -0.521212 |
| 11               | 6                | 0              | -0.938239               | 1.050170  | -0.227917 |
| 12               | 6                | 0              | 1.017176                | -0.573088 | -0.815819 |
| 13               | 1                | 0              | 1.435734                | 0.106439  | -1.562945 |
| 14               | 1                | 0              | 1.056010                | -1.581783 | -1.244945 |
| 15               | 6                | 0              | 6.140945                | -1.300631 | -0.038665 |
| 16               | 1                | 0              | 7.206153                | -1.488060 | -0.137896 |
| 17               | 6                | 0              | 5.322693                | -1.313817 | -1.169233 |
| 18               | 1                | 0              | 5.748871                | -1.511808 | -2.148060 |
| 19               | 6                | 0              | 3.954749                | -1.073160 | -1.044166 |

|    |   |   |           |           |           |
|----|---|---|-----------|-----------|-----------|
| 20 | 1 | 0 | 3.333871  | -1.088205 | -1.933673 |
| 21 | 6 | 0 | -0.209460 | 2.323436  | -0.143935 |
| 22 | 6 | 0 | -2.367153 | 0.996318  | 0.028236  |
| 23 | 6 | 0 | -2.864826 | -0.306256 | -0.081860 |
| 24 | 6 | 0 | 5.588937  | -1.047678 | 1.220539  |
| 25 | 1 | 0 | 6.224348  | -1.038487 | 2.101115  |
| 26 | 6 | 0 | 4.224522  | -0.808742 | 1.346591  |
| 27 | 1 | 0 | 3.772242  | -0.611821 | 2.312527  |
| 28 | 6 | 0 | -4.242228 | -0.675318 | 0.121613  |
| 29 | 6 | 0 | -5.814970 | -2.435576 | 0.151292  |
| 30 | 1 | 0 | -5.808932 | -3.511795 | -0.021336 |
| 31 | 1 | 0 | -6.486727 | -1.939226 | -0.553646 |
| 32 | 1 | 0 | -6.147504 | -2.213855 | 1.168527  |
| 33 | 6 | 0 | 1.854220  | 3.447125  | -0.353567 |
| 34 | 1 | 0 | 2.878271  | 3.181558  | -0.614429 |
| 35 | 1 | 0 | 1.806326  | 3.838168  | 0.664912  |
| 36 | 1 | 0 | 1.463741  | 4.200370  | -1.041709 |
| 37 | 1 | 0 | -4.101516 | 1.908035  | 0.523967  |
| 38 | 1 | 0 | -2.662727 | 2.959477  | 0.449206  |

-----

XYZ Coordinates Dimer

E = -2895.7100653

-----

| Center | Atomic | Atomic | Coordinates (Angstroms) |
|--------|--------|--------|-------------------------|
|--------|--------|--------|-------------------------|

| Number | Number | Type | X         | Y         | Z         |
|--------|--------|------|-----------|-----------|-----------|
| 1      | 16     | 0    | 4.559151  | -2.202241 | -0.575609 |
| 2      | 8      | 0    | 1.916666  | -3.421614 | -0.308693 |
| 3      | 8      | 0    | 7.093082  | -0.229788 | 1.534383  |
| 4      | 8      | 0    | 6.331945  | 1.973782  | -0.774183 |
| 5      | 7      | 0    | 2.197788  | 0.910742  | -0.286924 |
| 6      | 6      | 0    | 7.678978  | -0.415506 | 0.483751  |
| 7      | 8      | 0    | 4.243490  | 2.743580  | -0.436000 |
| 8      | 8      | 0    | 0.675769  | -1.527800 | -0.145065 |
| 9      | 6      | 0    | 9.174316  | -0.326257 | 0.406256  |
| 10     | 6      | 0    | 5.426344  | -0.718170 | -0.660205 |
| 11     | 6      | 0    | 4.592009  | 0.383944  | -0.554460 |
| 12     | 6      | 0    | 6.917488  | -0.772660 | -0.806333 |
| 13     | 1      | 0    | 7.239337  | -0.090106 | -1.597036 |
| 14     | 1      | 0    | 7.227577  | -1.780415 | -1.109413 |
| 15     | 6      | 0    | 11.970622 | -0.134271 | 0.398051  |
| 16     | 1      | 0    | 13.054220 | -0.059985 | 0.394222  |
| 17     | 6      | 0    | 11.289997 | -0.458923 | -0.776313 |
| 18     | 1      | 0    | 11.841765 | -0.638230 | -1.694148 |
| 19     | 6      | 0    | 9.898643  | -0.554147 | -0.773827 |
| 20     | 1      | 0    | 9.386543  | -0.807586 | -1.696070 |
| 21     | 6      | 0    | 5.003499  | 1.794201  | -0.574407 |
| 22     | 6      | 0    | 3.190607  | 0.016189  | -0.400465 |
| 23     | 6      | 0    | 3.024211  | -1.375986 | -0.399311 |

|    |    |   |           |           |           |
|----|----|---|-----------|-----------|-----------|
| 24 | 6  | 0 | 11.257278 | 0.093824  | 1.578482  |
| 25 | 1  | 0 | 11.785634 | 0.345242  | 2.493304  |
| 26 | 6  | 0 | 9.869763  | -0.002958 | 1.582507  |
| 27 | 1  | 0 | 9.293984  | 0.166870  | 2.485868  |
| 28 | 6  | 0 | 1.771681  | -2.068958 | -0.272557 |
| 29 | 6  | 0 | 0.705115  | -4.176646 | -0.185580 |
| 30 | 1  | 0 | 1.005118  | -5.223271 | -0.238187 |
| 31 | 1  | 0 | 0.013692  | -3.938240 | -0.998035 |
| 32 | 1  | 0 | 0.213227  | -3.970444 | 0.768706  |
| 33 | 6  | 0 | 6.774239  | 3.341390  | -0.769747 |
| 34 | 1  | 0 | 7.852594  | 3.298320  | -0.920814 |
| 35 | 1  | 0 | 6.539243  | 3.817349  | 0.184723  |
| 36 | 1  | 0 | 6.294598  | 3.904383  | -1.573860 |
| 37 | 1  | 0 | 1.239599  | 0.611943  | -0.159516 |
| 38 | 1  | 0 | 2.445297  | 1.889003  | -0.262598 |
| 39 | 16 | 0 | -4.557729 | 2.204155  | 0.566583  |
| 40 | 8  | 0 | -1.915953 | 3.422935  | 0.288066  |
| 41 | 8  | 0 | -7.099739 | 0.224955  | -1.529342 |
| 42 | 8  | 0 | -6.329331 | -1.971503 | 0.782244  |
| 43 | 7  | 0 | -2.197321 | -0.909343 | 0.275653  |
| 44 | 6  | 0 | -7.681526 | 0.413456  | -0.476925 |
| 45 | 8  | 0 | -4.242393 | -2.741942 | 0.436216  |
| 46 | 8  | 0 | -0.675832 | 1.528591  | 0.124511  |
| 47 | 6  | 0 | -9.176486 | 0.323521  | -0.393173 |
| 48 | 6  | 0 | -5.424538 | 0.720220  | 0.657495  |

|    |   |   |            |           |           |
|----|---|---|------------|-----------|-----------|
| 49 | 6 | 0 | -4.590535  | -0.382075 | 0.551082  |
| 50 | 6 | 0 | -6.915133  | 0.774926  | 0.809050  |
| 51 | 1 | 0 | -7.233843  | 0.094927  | 1.603227  |
| 52 | 1 | 0 | -7.224271  | 1.783615  | 1.110003  |
| 53 | 6 | 0 | -11.972607 | 0.129674  | -0.373109 |
| 54 | 1 | 0 | -13.056130 | 0.054666  | -0.364688 |
| 55 | 6 | 0 | -11.287508 | 0.458770  | 0.797411  |
| 56 | 1 | 0 | -11.835718 | 0.640827  | 1.716836  |
| 57 | 6 | 0 | -9.896244  | 0.554914  | 0.789020  |
| 58 | 1 | 0 | -9.380635  | 0.811830  | 1.708337  |
| 59 | 6 | 0 | -5.001837  | -1.792310 | 0.575949  |
| 60 | 6 | 0 | -3.189743  | -0.014593 | 0.391103  |
| 61 | 6 | 0 | -3.023406  | 1.377585  | 0.386512  |
| 62 | 6 | 0 | -11.263841 | -0.101933 | -1.555611 |
| 63 | 1 | 0 | -11.795686 | -0.356816 | -2.467447 |
| 64 | 6 | 0 | -9.876420  | -0.004215 | -1.565533 |
| 65 | 1 | 0 | -9.304146  | -0.176719 | -2.470613 |
| 66 | 6 | 0 | -1.771260  | 2.070206  | 0.254289  |
| 67 | 6 | 0 | -0.704693  | 4.177571  | 0.159735  |
| 68 | 1 | 0 | -1.004535  | 5.224350  | 0.210108  |
| 69 | 1 | 0 | -0.011253  | 3.941509  | 0.971163  |
| 70 | 1 | 0 | -0.215193  | 3.968589  | -0.795167 |
| 71 | 6 | 0 | -6.771613  | -3.339117 | 0.782832  |
| 72 | 1 | 0 | -7.849283  | -3.295707 | 0.938618  |
| 73 | 1 | 0 | -6.540887  | -3.817215 | -0.171613 |

|    |   |   |           |           |          |
|----|---|---|-----------|-----------|----------|
| 74 | 1 | 0 | -6.288381 | -3.900307 | 1.586056 |
| 75 | 1 | 0 | -1.239629 | -0.610688 | 0.144225 |
| 76 | 1 | 0 | -2.444884 | -1.887660 | 0.254194 |

---
